# Supplementary figures and images for: Integrated Transcriptome Analysis Identified Key Expansin Genes Associated with Wheat Cell Wall, Grain Weight and Yield
Source: MDPI journal article supplement (doi:10.3390/plants12152868), 2023-08-04

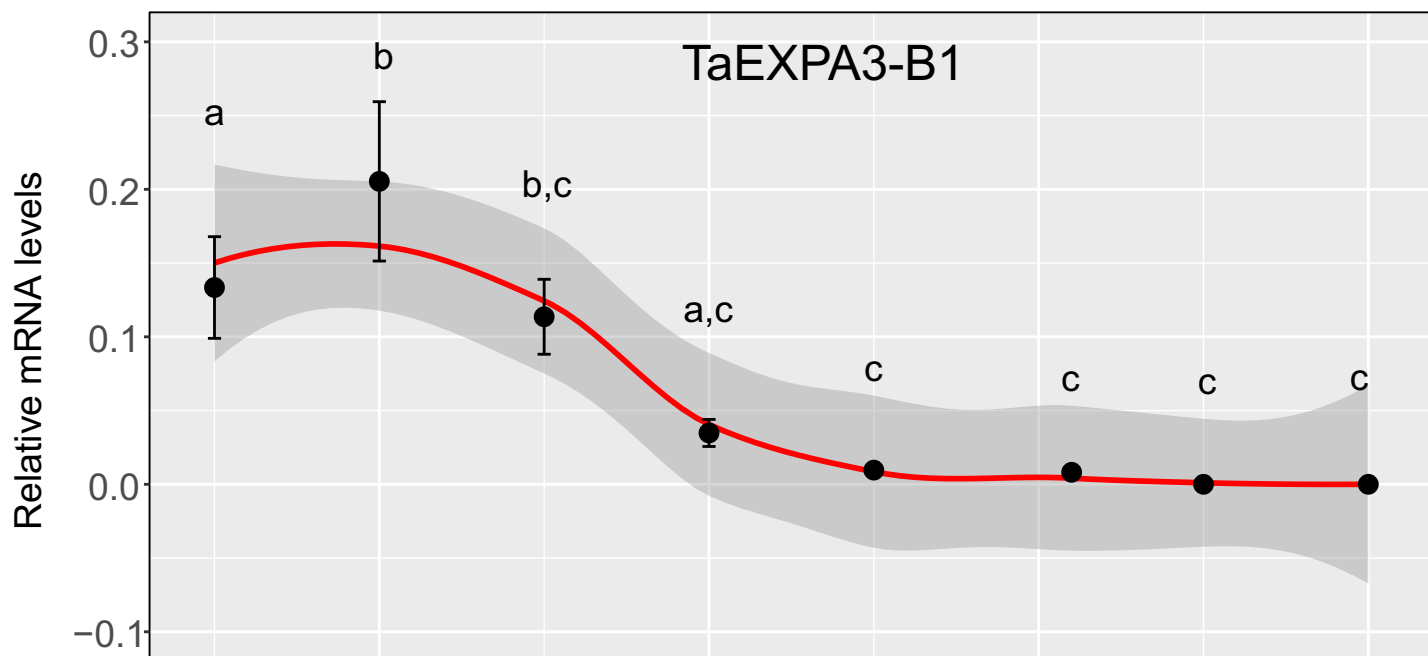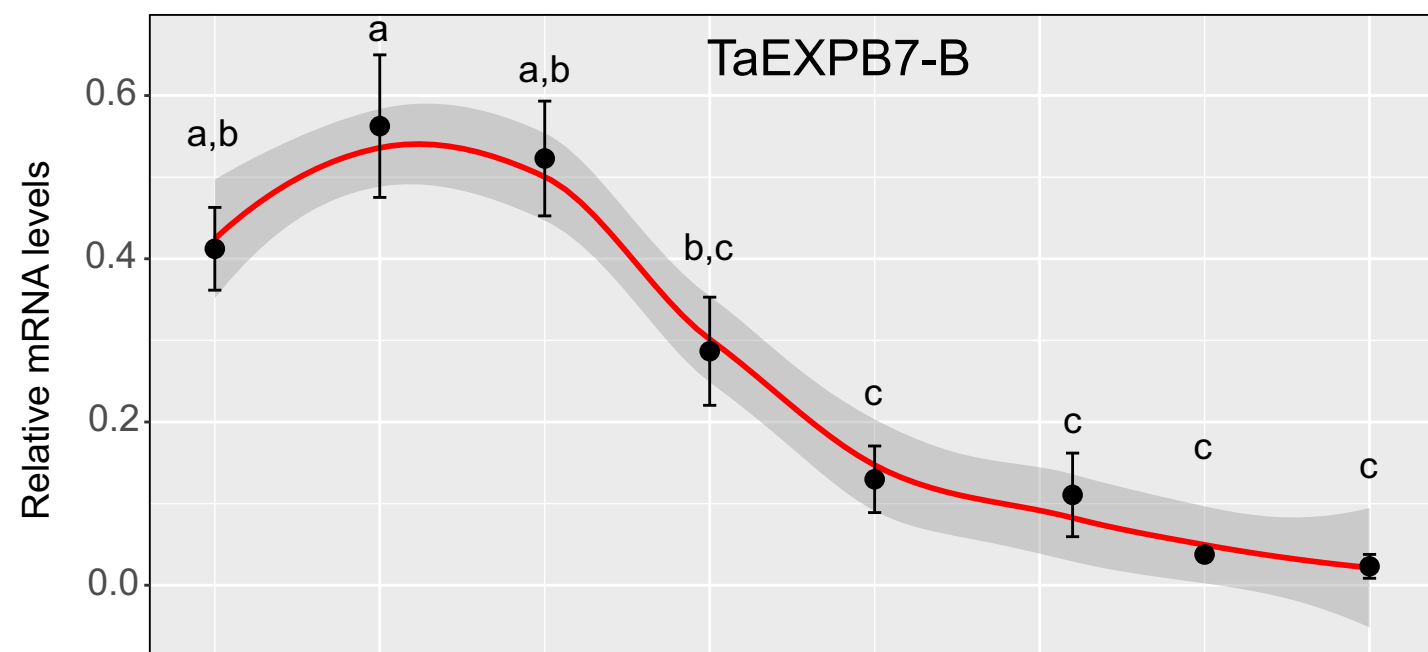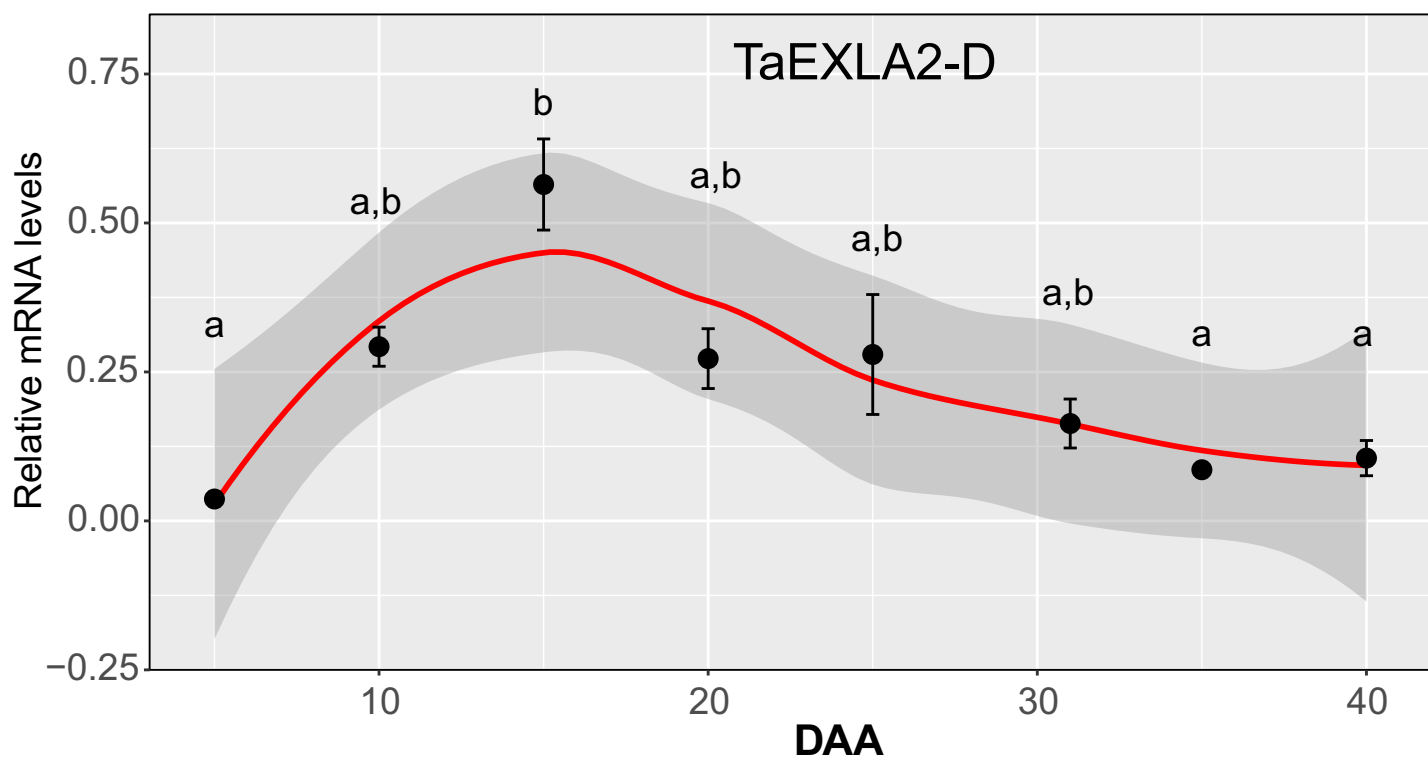

Supplement: s1 [file s1]

TaEXPA3-B1

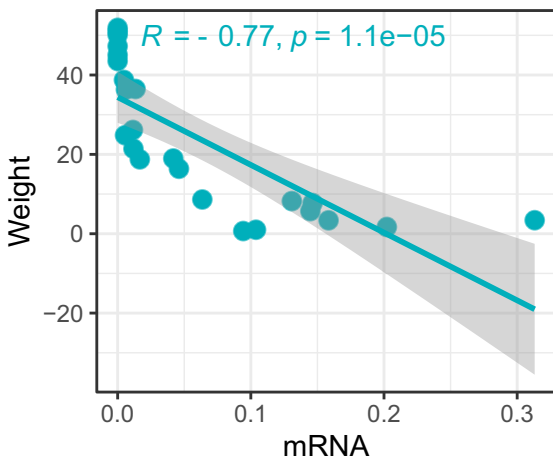

TaEXPB7-B

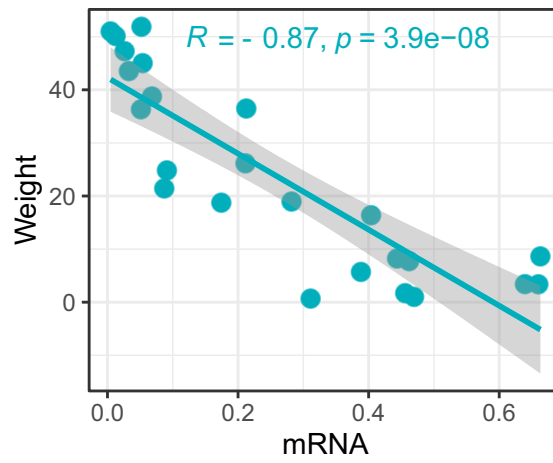

TaEXLA3-B

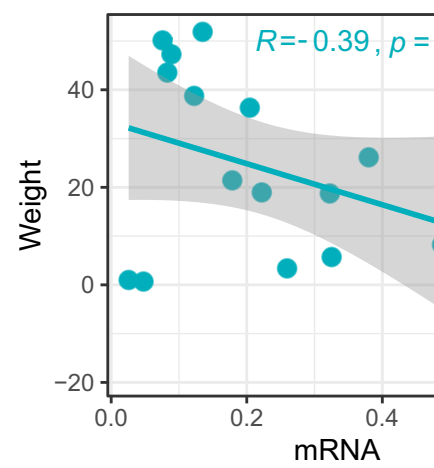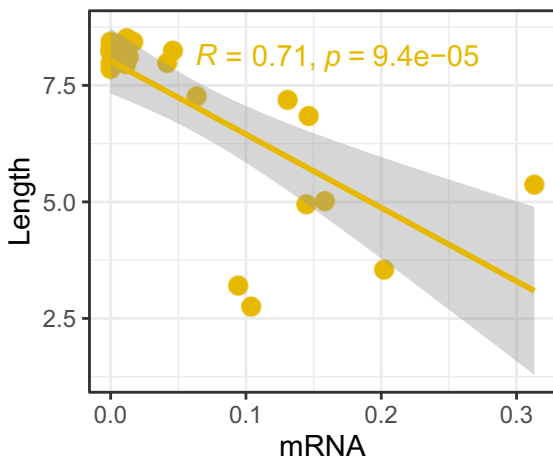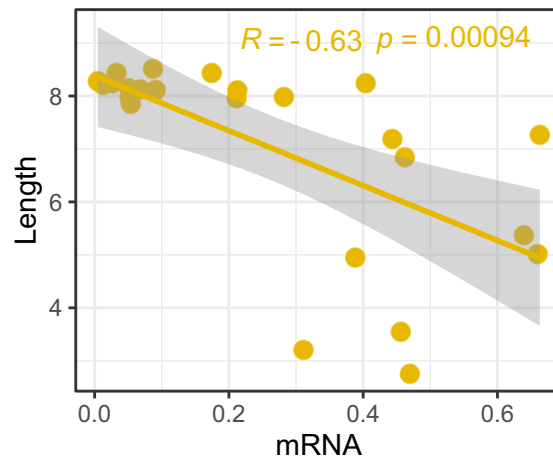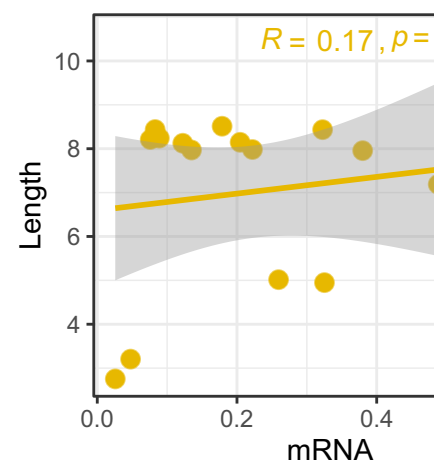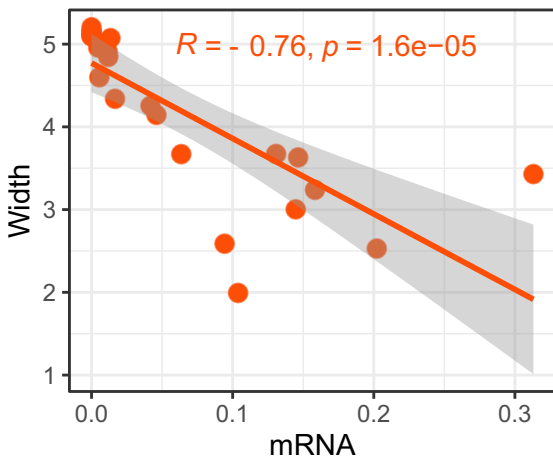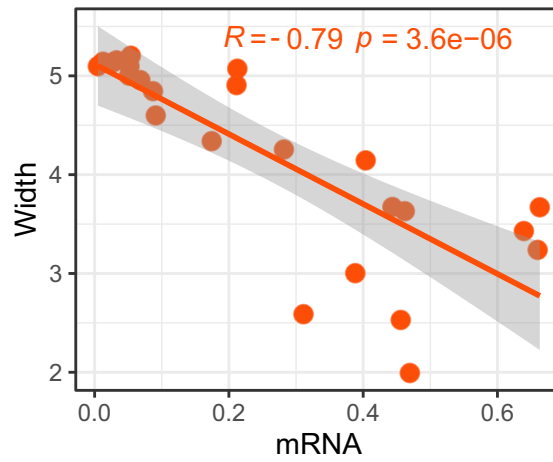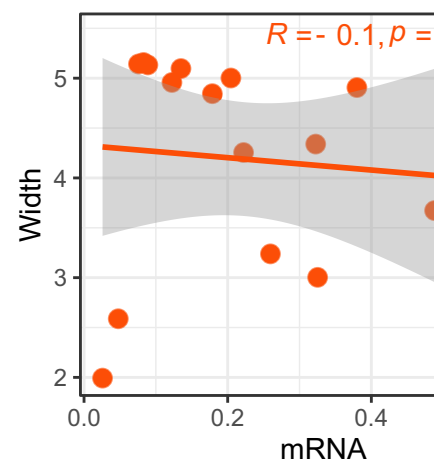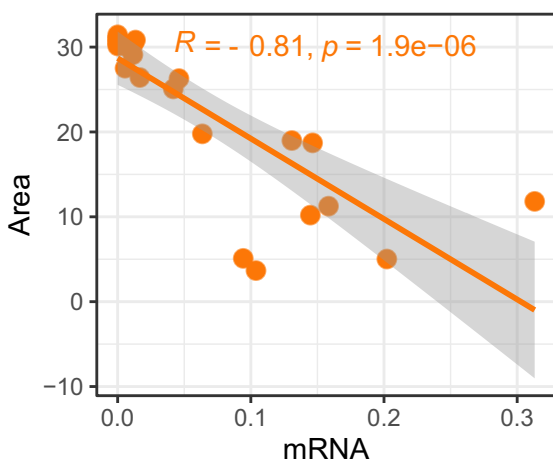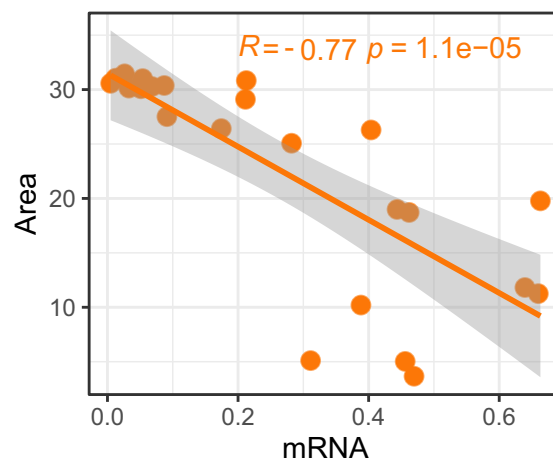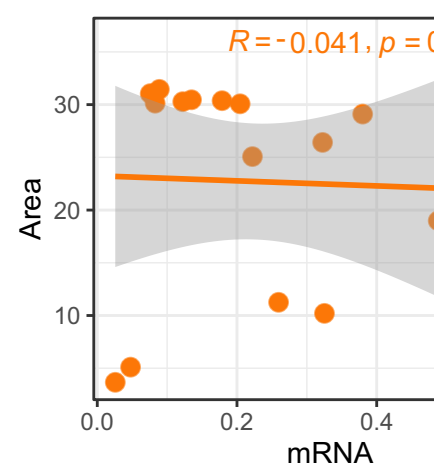

Supplement: s1 [file s1]
